# Supplementary material
Source: PubMed Central journal article supplement (PMC7606902)
Supplement: mmc1.pdf [file mmc1.pdf]

# THE LANCET

## Neurology

### Supplementary appendix

This appendix formed part of the original submission and has been peer reviewed. We post it as supplied by the authors.

Supplement to: Hurford R, Wolters FJ, Li L, et al. Prevalence, predictors, and prognosis of symptomatic intracranial stenosis in patients with transient ischaemic attack or minor stroke: a population-based cohort study. *Lancet Neurol* 2020; **19**: 413–21.

## Supplementary Material

**Supplementary Table 1a:** Prevalence of ICS in medically treated Caucasian TIA/ stroke patients

| Study                            | Location | Sample size | Mean age (years) | Caucasian (%) | IS/ TIA | Definition of ICS          |                                       | Prevalence of ICS |                       |
|----------------------------------|----------|-------------|------------------|---------------|---------|----------------------------|---------------------------------------|-------------------|-----------------------|
|                                  |          |             |                  |               |         | Screening imaging modality | Criteria                              | Any ICS n (%)     | Symptomatic ICS n (%) |
| <i>All ICS</i>                   |          |             |                  |               |         |                            |                                       |                   |                       |
| Sacco (NOMASS) 1995 <sup>1</sup> | USA      | 82          | 70               | 100           | IS      | TCD                        | Velocity criteria                     | -                 | 1.0%*                 |
| Wityk 1996 <sup>2</sup>          | USA      | 108         | 75               | 100           | IS/TIA  | TCD/MRA/CA                 | Velocity criteria or 50-100% stenosis | 26 (24.0)         | ~9.0%*                |
| Thijs 2000 <sup>3</sup>          | USA      | 1344        | -                | -             | IS/TIA  | CA/TCD/MRA                 | Velocity criteria or 50-99% stenosis  | 54 (4.0)          | 36 (2.7)              |
| Weimar 2006 <sup>4</sup>         | Germany  | 4,157       | 67               | -             | IS/TIA  | TCD/MRA/CTA/CA             | Velocity criteria or 50-100% stenosis | 1259 (30.3)       | 611 (14.7)            |
| Meseguer 2010 <sup>5</sup>       | France   | 1,823       | 61               | -             | TIA     | TCD                        | Velocity criteria                     | 161 (8.8)         | 67 (3.7)              |
| Weber 2010 <sup>6</sup>          | Germany  | 13,584      | 67               | -             | IS/TIA  | TCD/MRA                    | Velocity criteria or 50-99% stenosis  | 736 (5.4)         | 304 (2.2)             |
| Lau 2013 <sup>7</sup>            | USA      | 539         | 66               | 83            | IS/TIA  | CTA                        | Any grade of stenosis                 | 212 (39.3)        | 176 (32.7)            |
| Holzer 2009 <sup>8</sup>         | Germany  | 163         | 63               | 100           | TIA     | TCD                        | Velocity criteria                     | 15 (9.2)          | -                     |

|                                               |             |       |    |     |                         |             |                                                |               |              |
|-----------------------------------------------|-------------|-------|----|-----|-------------------------|-------------|------------------------------------------------|---------------|--------------|
| Homburg 2011 <sup>9</sup>                     | Netherlands | 786   | 62 | 90  | IS/TIA                  | CTA         | 50-100% stenosis                               | 77<br>(9.8)   | 18<br>(2.3)  |
| Von Weitzel-<br>Mudersbach 2012 <sup>10</sup> | Denmark     | 195   | 66 | 100 | TIA                     | TCD         | Velocity criteria                              | 24<br>(12.3)  | 16<br>(8.2)  |
| Amarenco 2012 <sup>11</sup>                   | France      | 1,679 | 64 | -   | TIA                     | TCD         | Velocity criteria                              | -             | 85<br>(5.0)  |
| Ovesen 2013 <sup>12</sup>                     | Denmark     | 652   | 67 | 95  | IS/TIA                  | CTA         | ≥30% stenosis                                  | 101<br>(15.5) | 3<br>(0.04)  |
| Ssi-Yan-Kai 2013 <sup>13</sup>                | France      | 129   | 64 | -   | IS/ TIA                 | MRA         | 50-100% stenosis                               | -             | 16<br>(12.4) |
| Wolff 2014 <sup>14</sup>                      | France      | 159   | 37 | 99  | Young IS<br>(age 18-45) | MRA/CTA/DSA | ≥50% stenosis                                  | -             | 49<br>(31.2) |
| Logallo 2014 <sup>15</sup>                    | Norway      | 607   | 73 | -   | IS/TIA                  | TCD/MRA/CTA | Velocity criteria<br>or any degree<br>stenosis | 69<br>(11.4)  | 45<br>(7.4)  |
| Tsivgoulis 2014 <sup>16</sup>                 | Greece      | 467   | 58 | 98  | IS/TIA                  | TCD         | Velocity criteria                              | 51<br>(10.9)  | 46<br>(9.8)  |
| Gouveia 2014 <sup>17</sup>                    | Portugal    | 1,302 | 72 | -   | IS/TIA                  | TCD/CTA     | Velocity criteria<br>or ≥50% stenosis          | 158<br>(12.1) | 75<br>(5.8)  |
| Baracchini 2016 <sup>18</sup>                 | Italy       | 1,134 | 71 | 97  | IS                      | TCD         | Velocity criteria                              | -             | 99<br>(8.7)  |
| Hoshino 2018 <sup>19</sup>                    | France      | 403   | 62 | -   | IS                      | TCD/MRA/CTA | Velocity criteria<br>or 50-100%<br>stenosis    | 146<br>(36.2) | 72<br>(17.9) |
| Uchiyama 2019 <sup>20</sup>                   | France      | 3317  | 66 | 78  | IS/TIA                  | TCD/MRA/CTA | Velocity criteria<br>or 50-100%<br>stenosis    | 424<br>(12.8) | -            |

***Anterior circulation  
ICS only***

|                                               |              |       |    |    |                           |     |                                                           |               |                           |
|-----------------------------------------------|--------------|-------|----|----|---------------------------|-----|-----------------------------------------------------------|---------------|---------------------------|
| Kappelle (NASCET)1999 <sup>21</sup>           | USA          | 2589  | 66 | 95 | IS/ TIA                   | CA  | 50-100% ACA, MCA, intracranial ICA stenosis               | -             | 14 <sup>§</sup><br>(0.5)  |
| von Sarnowski <sup>‡</sup> 2013 <sup>22</sup> | Pan-European | 1,561 | 46 | -  | Young IS/ TIA (age 18-55) | TCD | Velocity criteria                                         | 184<br>(11.8) | 137<br>(8.8)              |
| Mattioni 2014 <sup>23</sup>                   | Netherlands  | 220   | 65 | -  | IS/TIA                    | CTA | Intracranial ICA and MCA any degree stenosis or occlusion | 85<br>(38.6)  | 80 <sup>§</sup><br>(36.4) |
| <b>Posterior circulation ICS only</b>         |              |       |    |    |                           |     |                                                           |               |                           |
| Marquardt 2009 <sup>24</sup>                  | UK           | 141   | 69 | 95 | Vertebrobasilar IS/TIA    | MRA | ≥50% intracranial VA or BA stenosis                       | -             | 14<br>(9.9)               |
| Klein 2010 <sup>25</sup>                      | France       | 41    | 66 | -  | Pontine IS                | MRA | ≥30% BA stenosis                                          | -             | 7<br>(17.1)               |
| von Sarnowski <sup>‡</sup> 2013 <sup>22</sup> | Pan-European | 1,511 | 46 | -  | Young IS/ TIA (age 18-55) | TCD | Velocity criteria                                         | 75<br>(5.0)   | 45<br>(3.0)               |

*\*N not reported, <sup>§</sup>Ipsilateral to symptomatic ICA stenosis, <sup>‡</sup> study reports anterior and posterior circulation ICS separately without noting duplicate patients hence are reported separately in this table. Prevalence of stenoses reported with different denominators for anterior and posterior circulation. IS= ischaemic stroke, ICS= intracranial stenosis, CA= catheter angiography, TCD= transcranial Doppler, MRA= magnetic resonance angiography, CTA= computed tomography angiography, DSA= digital subtraction angiography.*

**Supplementary Table 1b:** Risk of recurrent ischaemic stroke in Caucasian TIA/ stroke patients due to symptomatic ICS receiving medical treatment only.

| Study                                | Location | Sample size | Mean age (years) | Caucasian (%) | IS/ TIA | Definition of ICS          |                                       | Prognosis of ICS        |                |                         |
|--------------------------------------|----------|-------------|------------------|---------------|---------|----------------------------|---------------------------------------|-------------------------|----------------|-------------------------|
|                                      |          |             |                  |               |         | Screening imaging modality | Criteria                              | Mean follow-up (months) | Any IS n (%)   | Same territory IS n (%) |
| <i>All ICS</i>                       |          |             |                  |               |         |                            |                                       |                         |                |                         |
| Thijs 2000 <sup>3</sup>              | USA      | 52          | 67               | 65            | IS/TIA  | CA/TCD/MRA                 | Velocity criteria or 50-99% stenosis  | 17                      | 6 (11.5)       | -                       |
| Chimowitz (WASID) 2005 <sup>26</sup> | USA      | 280*        | 63               | 58            | IS/TIA  | TCD/MRA/CTA                | ≥50% stenosis                         | 22                      | 57 (20.4)      | 42 (15.0)               |
| Mazighi 2006 <sup>27</sup>           | France   | 102         | 63               | 97            | IS/TIA  | MRA/CTA/DSA                | 50-99% stenosis                       | 23                      | -              | 14 (13.7)               |
| Weimar 2006 <sup>4</sup>             | Germany  | 272         | 67               | -             | IS/TIA  | TCD/MRA/CTA/CA             | Velocity criteria or 50-100% stenosis | -                       | 26 (9.6) at 1y | -                       |
| Samaniego 2009 <sup>28</sup>         | USA      | 58          | 65               | 83            | IS/TIA  | MRA/CTA/DSA                | Undefined                             | 14                      | 3 (5.1)        | -                       |
| Weber 2010 <sup>6</sup>              | Germany  | 197         | 65               | -             | IS/TIA  | TCD/MRA                    | Velocity criteria or 50-99% stenosis  | 24                      | 23.3% at 3y    | -                       |
| Kozak 2011 <sup>29</sup>             | USA      | 25          | 61               | 72            | IS/TIA  | CA                         | 50-99% stenosis                       | 16                      | -              | 11 (44.0)               |
| Nahab 2013 <sup>30</sup>             | USA      | 22          | 66               | 59            | IS/TIA  | CA/CTA                     | 50-99% stenosis                       | 14                      | 0              | 0                       |
| Gouveia 2014 <sup>17</sup>           | Portugal | 72          | 73               | -             | IS/TIA  | TCD/CTA                    | Velocity criteria or ≥50% stenosis    | 14                      | -              | 14 (19.4)               |

|                                             |           |       |    |    |        |             |                                                 |    |                             |                               |
|---------------------------------------------|-----------|-------|----|----|--------|-------------|-------------------------------------------------|----|-----------------------------|-------------------------------|
| Derdeyn (SAMMPRIS) 2014 <sup>31</sup>       | USA       | 227   | 60 | 71 | IS/TIA | CA          | 70-99% stenosis                                 | 32 | -                           | 31 (13.7)                     |
| Zaidat (VISSIT) 2015 <sup>32</sup>          | USA       | 53    | 62 | 72 | IS/TIA | CA          | 70-99% stenosis                                 | -  | -                           | 5 (9.4) at 1y                 |
| Caliandro 2018 <sup>33</sup>                | Italy     | 48    | 65 | -  | IS/TIA | TCD         | Velocity criteria                               | -  | -                           | 5 <sup>‡</sup> (10.4) at 1y   |
| Hoshino 2018 <sup>19</sup>                  | France    | 72    | 65 | -  | IS     | TCD/MRA/CTA | Velocity criteria or 50-100% stenosis           | -  | 9 <sup>‡</sup> (13.2) at 4y | -                             |
| Uchiyama (TIAregistry) 2019 <sup>20</sup>   | France    | 4,238 | 66 | 78 | IS/TIA | TCD/MRA/CTA | Velocity criteria or 50-100% stenosis           | -  | 194 (4.8) at 1y             | -                             |
| <b><i>Anterior circulation ICS only</i></b> |           |       |    |    |        |             |                                                 |    |                             |                               |
| Hinton 1979 <sup>34</sup>                   | USA       | 16    | 62 | -  | IS/TIA | CA          | 40-100% MCA stenosis                            | 36 | -                           | 2 (12.5)                      |
| EC/IC bypass study group 1985 <sup>35</sup> | Worldwide | 714   | 56 | -  | IS/TIA | CA          | Any degree of MCA and intracranial ICA stenosis | 56 | -                           | ~10.0% at 1y                  |
| Wechler 1986 <sup>36</sup>                  | USA       | 12    | 62 | -  | IS/TIA | CA          | 50-100% carotid siphon stenosis                 | 51 | -                           | 3 (25.0)                      |
| Kappelle (NASCET) 1999 <sup>21</sup>        | USA       | 2589  | 66 | 93 | IS/TIA | CA          | 50-100% ACA, MCA, intracranial ICA stenosis     | -  | -                           | 19.4-45.7% <sup>§</sup> at 3y |
| Arenillas 2001 <sup>37</sup>                | Spain     | 40    | 62 | -  | IS/TIA | TCD         | MCA velocity criteria                           | 27 | -                           | 8 (20.0)                      |
| Kern 2005 <sup>38</sup>                     | Germany   | 46    | 57 | -  | IS/TIA | TCD         | Velocity criteria                               | -  | -                           | 11 <sup>‡</sup> (23.9)        |

***Posterior circulation ICS only***

|                                  |     |     |     |    |                        |                 |                                       |    |           |             |
|----------------------------------|-----|-----|-----|----|------------------------|-----------------|---------------------------------------|----|-----------|-------------|
| Moufarrij 1986 <sup>39</sup>     | USA | 44  | ~58 | -  | Vertebrobasilar IS/TIA | CA              | ≥50% intracranial VA or BA stenosis   | 73 | -         | 5<br>(11.4) |
| Pessin 1987 <sup>40</sup>        | USA | 9   | 62  | 56 | Vertebrobasilar IS/TIA | CA              | ≥40% distal BA stenosis               | 21 | -         | 1<br>(11.1) |
| Pessin 1987 <sup>41</sup>        | USA | 6   | 70  | -  | PCA territory IS/TIA   | CA              | ≥50% PCA stenosis                     | 9  | 0         | 0           |
| Qureshi 2003 <sup>42</sup>       | USA | 102 | 64  | 54 | Vertebrobasilar IS/TIA | CA/MRA          | 50-99% intracranial VA or BA stenosis | 15 | 14 (13.7) | 8<br>(7.8)  |
| Markus (VIST) 2017 <sup>43</sup> | UK  | 88  | 67  | -  | Vertebrobasilar IS/TIA | MRA/CTA/<br>DSA | ≥50% intracranial VA stenosis         | 29 | -         | 4<br>(4.6)  |

---

*\*patients randomised to receive aspirin, § medical arm of NASCET, ¥ ischaemic stroke and TIA. IS= ischaemic stroke, TIA= transient ischaemic attack, ICS= intracranial stenosis, CA= catheter angiography, TCD= transcranial Doppler, MRA= magnetic resonance angiography, CTA= computed tomography angiography, DSA= digital subtraction angiography, MCA middle cerebral artery, ICA= internal carotid artery, VA= vertebral artery, BA= basilar artery, PCA= posterior cerebral artery*

**Supplementary Table 2:** Standard anatomical landmarks used to locate extra- and intracranial stenoses.

| Vessel                                 | Anatomical landmark                                                                                                                 |
|----------------------------------------|-------------------------------------------------------------------------------------------------------------------------------------|
| Subclavian artery                      | Right – from the brachiocephalic trunk (left - from the aortic arch) to the lateral border of the first rib.                        |
| Common carotid artery                  | Right – from the brachiocephalic trunk (left - from the aortic arch) to the terminal internal and external carotid artery branches. |
| Cervical internal carotid artery (ICA) | Left and right. Cervical segment – terminal branch of common carotid artery to petrous portion of temporal bone.                    |
| Distal internal carotid artery (ICA)   | Left and right. C2 to C7 – petrous portion of temporal bone to the terminal branching of ACA and MCA.                               |
| Middle cerebral artery (MCA) M1        | Left and right terminal bifurcation of ICA until bifurcation to superior or inferior divisions.                                     |
| Middle cerebral artery (MCA) M2        | From the main bifurcation of MCA coursing posterosuperiorly within the insula cleft to circular sulcus of insula.                   |
| Anterior cerebral artery (ACA)         | Left and right branches of ICA. A1, A2 and anterior communicating subdivisions considered as one.                                   |
| Posterior communicating artery (Pcomm) | Left and right from the distal ICA (prior to the ACA and MCA bifurcation) to the PCA P1 segment.                                    |
| Posterior cerebral artery (PCA) P1     | Left and right terminal branches of the basilar artery to the Pcomm in interpeduncular cistern.                                     |
| Posterior cerebral artery (PCA) P2     | Left and right. From P1 Pcomm junction to quadrigeminal cistern.                                                                    |
| Basilar artery (BA)                    | Confluence of left and right V4 to terminal bifurcation of left and right PCA.                                                      |
| Vertebral artery (VA) V1               | Left and right – origin from subclavian arteries to transverse foramen of C6 vertebrae.                                             |
| Vertebral artery (VA) V2               | Left and right – from transverse foramen of C6 vertebrae to transverse foramen of C2.                                               |
| Vertebral artery (VA) V3               | Left and right – from transverse foramen of C2 to dura.                                                                             |
| Vertebral artery (VA) V4               | Left and right – from dura to basilar artery formation (or termination as posterior inferior cerebellar artery).                    |



**Supplementary Table 3:** Details of imaging received by study patients and reasons for non-imaging.

| <b>Imaging modality</b>                            | <b>Patients (%)<br/>N= 1579</b> |
|----------------------------------------------------|---------------------------------|
| <b>Intracranial vascular imaging</b>               |                                 |
| Magnetic resonance angiography                     | 1034 (65.5)                     |
| Computed tomography angiography                    | 253 (16.0)                      |
| Transcranial Doppler ultrasound                    | 81 (5.2)                        |
| <b>Extracranial vascular imaging only</b>          |                                 |
| Carotid Doppler ultrasound                         | 154 (9.8)                       |
| <b>No vascular imaging</b>                         | 57 (3.6)                        |
| <i>Known atrial fibrillation</i>                   | 25                              |
| <i>Previously investigated or imaged elsewhere</i> | 8                               |
| <i>Other clinical or logistical issue</i>          | 24                              |

**Supplementary Table 4:** Baseline characteristics of study population, stratified by intracranial vascular imaging.

|                                       | <i>Intracranial vascular<br/>imaging<br/>(N= 1368)</i> | <i>No intracranial vascular<br/>imaging<br/>(N= 211)</i> | <b>p-value</b> |
|---------------------------------------|--------------------------------------------------------|----------------------------------------------------------|----------------|
| Mean age (SD)                         | 69.2 (13.9)                                            | 76.5 (12.1)                                              | <0.0001        |
| Male sex (%)                          | 700 (51.2)                                             | 110 (52.1)                                               | 0.82           |
| Caucasian (%)                         | 1291 (94.4)                                            | 201 (95.3)                                               | 0.75           |
| Hypertension (%)                      | 754 (55.1)                                             | 147 (69.7)                                               | <0.0001        |
| Diabetes mellitus (%)                 | 183 (13.4)                                             | 48 (22.7)                                                | 0.0004         |
| Hyperlipidaemia (%)                   | 466 (34.1)                                             | 79 (37.4)                                                | 0.35           |
| Current smoker (%)                    | 193 (14.1)                                             | 25 (11.8)                                                | 0.45           |
| Atrial fibrillation (%)               | 204 (14.9)                                             | 57 (27.0)                                                | <0.0001        |
| Any vascular disease <sup>§</sup> (%) | 373 (27.3)                                             | 106 (50.2)                                               | <0.0001        |
| History of stroke or TIA (%)          | 204 (14.9)                                             | 76 (36.0)                                                | <0.0001        |
| PVD (%)                               | 61 (4.5)                                               | 17 (8.1)                                                 | 0.038          |
| IHD (%)                               | 179 (13.1)                                             | 52 (24.6)                                                | 0.0005         |
| Event type                            |                                                        |                                                          |                |
| TIA (%)                               | 892 (65.2)                                             | 108 (51.2)                                               | <0.0001        |
| Minor stroke (%)                      | 476 (34.8)                                             | 103 (48.8)                                               |                |
| TOAST classification                  |                                                        |                                                          |                |
| Cardioembolic (%)                     | 210 (15.4)                                             | 69 (32.7)                                                |                |
| Atherosclerotic (%)                   | 181 (13.2)                                             | 21 (10.0)                                                |                |
| Undetermined (%)                      | 543 (39.7)                                             | 35 (16.6)                                                | 0.15           |
| Lacunar (%)                           | 133 (9.7)                                              | 24 (11.4)                                                |                |
| Multiple/unknown/other (%)            | 301 (22.0)                                             | 62 (29.3)                                                |                |
| Vascular territory                    |                                                        |                                                          |                |
| Carotid (%)                           | 716 (52.3)                                             | 148 (70.1)                                               |                |
| Vertebrobasilar (%)                   | 504 (36.8)                                             | 37 (17.5)                                                | <0.0001        |
| Uncertain/ both (%)                   | 148 (10.8)                                             | 26 (12.3)                                                |                |

*PVD= peripheral vascular disease, IHD= ischaemic heart disease. <sup>§</sup>vascular disease = ischaemic stroke/ TIA, PVD or IHD.*

**Supplementary Table 5:** Distribution of any 50-99% intracranial stenosis (ICS) and extracranial vascular stenosis stratified by magnetic resonance angiography (MRA) and computed tomography angiography (CTA).

|                             | Affected vessels /<br>total number of<br>vessels imaged (%) <sup>¶</sup> | MRA, 1034<br>patients | CTA, 253<br>patients | p-value |
|-----------------------------|--------------------------------------------------------------------------|-----------------------|----------------------|---------|
| <b>Intracranial vessels</b> |                                                                          |                       |                      |         |
| Distal ICA                  | 84/ 2458 (3.4)                                                           | 49/ 1954 (2.5)        | 35/ 504 (6.9)        | <0.0001 |
| ACA                         | 29/ 2565 (1.1)                                                           | 28/ 2059 (1.4)        | 1/ 506 (0.2)         | 0.031   |
| MCA (M1+M2)                 | 98/ 2573 (3.8)*                                                          | 84/ 2063 (4.1)        | 10/ 506 (2.0)        | 0.048   |
| PCA (P1+P2)                 | 93/ 2559 (3.6)                                                           | 83/ 2053 (4.0)        | 10/ 506 (2.0)        | 0.024   |
| PComm                       | 3/ 847 (0.4)                                                             | 3/ 685 (0.4)          | 0/ 162 (0)           | 0.99    |
| Basilar                     | 13/ 1285 (1.0)                                                           | 11/ 1032 (1.1)        | 2/ 253 (0.8)         | 0.99    |
| Vertebral (V4)              | 74/ 2557 (2.9)                                                           | 53/ 2051 (2.6)        | 21/ 506 (4.2)        | 0.072   |
| <b>Extracranial vessels</b> |                                                                          |                       |                      |         |
| Subclavian                  | 76/ 2424 (3.1)                                                           | 69/ 1944 (3.6)        | 7/ 480 (1.5)         | 0.018   |
| Common carotid              | 34/ 2900 (1.2) <sup>□</sup>                                              | 11/ 1960 (0.6)        | 22/ 491 (4.5)        | <0.0001 |
| Proximal ICA                | 273/ 2867 (9.5) <sup>‡</sup>                                             | 132/1960(6.7)         | 67/491 (13.6)        | <0.0001 |
| Vertebral (V1-3)            | 236/ 2447 (9.6)                                                          | 200/1949 (10.3)       | 36/469 (7.7)         | 0.10    |

ICA= internal carotid artery; ACA = anterior cerebral artery; MCA = medial cerebral artery; PCA = posterior cerebral artery; PComm = posterior communicating artery. <sup>¶</sup>A single ICS affecting two contiguous vessel segments are counted as two. <sup>\*</sup>Including 4 MCA ICS detected by transcranial Doppler. <sup>□</sup> Including carotid Doppler ultrasound 1 / 449; <sup>‡</sup>including carotid Doppler ultrasound 74 / 416.

**Supplementary Table 6:** The association between the presence of proximal extracranial internal carotid artery (ICA)\* stenosis and intracranial stenosis (ICS) stratified by age.

| N (%)               | ICS                         | No ICS     |
|---------------------|-----------------------------|------------|
| <b>All ages</b>     |                             |            |
| ICA stenosis        | 57 (32.0)                   | 121 (68.0) |
| No ICA stenosis     | 167 (15.1)                  | 936 (84.9) |
| OR (95% CI)         | 2.64 (1.85-3.77), p<0.0001  |            |
| <b>&lt;70 years</b> |                             |            |
| ICA stenosis        | 8 (18.6)                    | 35 (81.4)  |
| No ICA stenosis     | 38 (7.3)                    | 482 (92.7) |
| OR (95% CI)         | 2.90 (1.26- 6.69), p= 0.013 |            |
| <b>≥70 years</b>    |                             |            |
| ICA stenosis        | 49 (36.3)                   | 86 (62.7)  |
| No ICA stenosis     | 129 (22.1)                  | 454 (77.9) |
| OR (95% CI)         | 2.01 (1.34- 3.00), p=0.0010 |            |

\*17 patients did not have extracranial ICA imaging. ICA= internal carotid artery, OR= odds ratio; CI= confidence interval

**Supplementary Table 7:** Risk of outcomes in the OXVASC cohort categorised by the presence of 50-99% symptomatic or asymptomatic intracranial stenosis (ICS) versus no ICS.

|                           | ICS<br>Event/ total | No ICS<br>Event/ total | Unadjusted HR<br>(95% CI) | p-value | Adjusted HR <sup>§</sup><br>(95% CI) | p-value |
|---------------------------|---------------------|------------------------|---------------------------|---------|--------------------------------------|---------|
| <b>Asymptomatic ICS</b>   |                     |                        |                           |         |                                      |         |
| Ischaemic stroke          | 8/ 147              | 57/ 1108               | 1.09 (0.52- 2.28)         | 0.82    | 0.76 (0.36- 1.62)                    | 0.48    |
| Death                     | 28/ 147             | 115/ 1108              | 1.96 (1.30- 2.96)         | 0.001   | 1.05 (0.69- 1.59)                    | 0.83    |
| Ischaemic vascular event* | 11/ 147             | 76/ 1108               | 1.10 (0.58- 2.06)         | 0.87    | 0.73 (0.38- 1.40)                    | 0.34    |
| <b>Symptomatic ICS</b>    |                     |                        |                           |         |                                      |         |
| Ischaemic stroke          | 12/ 94              | 57/ 1108               | 1.63 (1.19- 2.22)         | 0.002   | <b>1.43 (1.04- 1.96)</b>             | 0.027   |
| Death                     | 24/ 94              | 115/ 1108              | 1.65 (1.33- 2.06)         | <0.0001 | <b>1.29 (1.03-1.62)</b>              | 0.024   |
| Ischaemic vascular event* | 15/ 94              | 76/ 1108               | 1.56 (1.18- 2.05)         | 0.002   | <b>1.35 (1.02- 1.79)</b>             | 0.038   |

*Patients with intracranial vessel occlusion (n=19) were excluded. \*Isch vascular event= any of ischaemic stroke, peripheral vascular disease or ischaemic heart disease.  
<sup>§</sup>adjusted for age, event type and prior ischaemic vascular event.*

**Supplemental Table 8:** Baseline characteristics of patients with 50-99% and 70-99% symptomatic ICS in the OXVASC cohort, compared with the no-stenting medical management only arms of SAMMPRIS (Derdeyn *et al.*<sup>31</sup>) and VISSIT (Zaidat *et al.*<sup>32</sup>).

| Characteristic        | OXVASC<br>medical<br>management<br>50-99% ICS <sup>¶</sup><br>(N= 66) | OXVASC<br>medical<br>management<br>70-99% ICS <sup>¶</sup><br>(N= 36) | SAMMPRIS<br>medical<br>management only<br>arm<br>(N= 227) | p-value* | VISSIT<br>medical<br>management only<br>arm<br>(N= 53) | p-value <sup>§</sup> |
|-----------------------|-----------------------------------------------------------------------|-----------------------------------------------------------------------|-----------------------------------------------------------|----------|--------------------------------------------------------|----------------------|
| Mean age (SD)         | 73.0 (14.1)                                                           | 70.5 (15.8)                                                           | 59.5 (11.8)                                               | <0.0001  | 61.8 (12.8)                                            | 0.0046               |
| Male sex (%)          | 40 (60.6)                                                             | 26 (72.2)                                                             | 145 (63.9)                                                | 0.12     | 32 (60.4)                                              | 0.12                 |
| Caucasian (%)         | 62 (93.9)                                                             | 36 (100.0)                                                            | 162 (71.4)                                                | <0.0001  | 38 (71.7)                                              | <0.0001              |
| Hypertension (%)      | 44 (66.7)                                                             | 22 (61.1)                                                             | 203 (89.4)                                                | 0.0002   | 43 (81.1)                                              | 0.10                 |
| Diabetes mellitus (%) | 11 (16.7)                                                             | 6 (16.7)                                                              | 103 (45.4)                                                | 0.0037   | 20 (37.7)                                              | 0.12                 |
| Hyperlipidaemia (%)   | 26 (39.4)                                                             | 13 (36.1)                                                             | 202 (89.0)                                                | <0.0001  | 32 (60.4)                                              | 0.064                |
| PVD (%)               | 8 (11.6)                                                              | 4 (11.1)                                                              | -                                                         | -        | 5 (9.4)                                                | 0.75                 |
| IHD (%)               | 13 (19.7)                                                             | 6 (16.7)                                                              | 59 (26.0)                                                 | 0.34     | 12 (22.6)                                              | 0.80                 |
| Current smoker (%)    | 11 (16.7)                                                             | 6 (16.7)                                                              | 69 (30.4)                                                 | 0.027    | 12 (22.6)                                              | 0.31                 |
| Prior stroke/ TIA (%) | 19 (28.8)                                                             | 9 (25.0)                                                              | 58 (25.6)                                                 | 0.53     | -                                                      | -                    |
| Event type            |                                                                       |                                                                       |                                                           |          |                                                        |                      |
| TIA (%)               | 36 (54.5)                                                             | 22 (61.1)                                                             | 75 (33.0)                                                 |          | 22 (41.5)                                              |                      |
| Stroke (%)            | 30 (45.5)                                                             | 14 (38.9)                                                             | 152 (67.0)                                                | 0.003    | 34 (64.2)                                              | 0.071                |
| Vascular territory    |                                                                       |                                                                       |                                                           |          |                                                        |                      |
| Carotid (%)           | 36 (54.5)                                                             | 22 (61.1)                                                             | 154 (67.9)                                                |          | -                                                      |                      |
| Vertebrobasilar (%)   | 30 (45.5)                                                             | 14 (38.9)                                                             | 73 (32.2)                                                 | 0.16     | -                                                      | -                    |

PVD= peripheral vascular disease, IHD= ischaemic heart disease.

<sup>¶</sup>Otherwise patients fulfil trial inclusion criteria. Of 94 patients with 50-99% symptomatic ICS, 58 patients did not fulfil trial inclusion criteria (30 50-69% ICS, 20 coexistent atrial fibrillation, 4 bilateral vertebral artery ICS, 1 received percutaneous stenting, 1 medullary infarct with vertebral artery ICS and 2 tandem stenoses). \*OXVASC 70-99% vs SAMMPRIS, <sup>§</sup>OXVASC 70-99% vs VISSIT

**Supplementary Table 9:** Number of 50-99% symptomatic ICS patients (excluding those with atrial fibrillation) compliant with therapy during follow-up.

|                          | <b>Baseline</b> | <b>1 month</b> | <b>6 months</b> | <b>1 year</b> | <b>5 years</b> |
|--------------------------|-----------------|----------------|-----------------|---------------|----------------|
| No antihypertensives (%) | 12 (16.2)       | 9 (12.9)       | 10 (15.3)       | 9 (14.1)      | 6 (23.1)       |
| 1 antihypertensive (%)   | 17 (23.0)       | 12 (17.1)      | 12 (18.5)       | 2 (23.4)      | 2 (7.7)        |
| ≥2 antihypertensives (%) | 45 (60.8)       | 49 (70.0)      | 43 (66.2)       | 40 (62.5)     | 18 (69.2)      |
| Antiplatelet therapy (%) | 74 (100)        | 69 (98.6)      | 61 (93.8)       | 57 (89.1)     | 25 (96.2)      |
| Statin therapy (%)       | 65 (87.8)       | 65 (92.9)      | 59 (90.8)       | 58 (90.6)     | 23 (88.5)      |
| Total number of patients | 74              | 70             | 65              | 64            | 26             |

**Supplementary Table 10:** characteristics of patients with 50-99% symptomatic ICS

|                                   | All symptomatic ICS patients<br>N= 94 | Patients with recurrent stroke or death<br>N= 35 | Patients without recurrent stroke or death<br>N= 59 | p-value |
|-----------------------------------|---------------------------------------|--------------------------------------------------|-----------------------------------------------------|---------|
| Mean age (SD)                     | 73.7 (13.5)                           | 78.7 (12.7)                                      | 70.7 (13.2)                                         | 0.0049  |
| Male (%)                          | 59 (62.8)                             | 21 (60.0)                                        | 38 (64.4)                                           | 0.83    |
| Hypertension (%)                  | 64 (68.1)                             | 29 (82.9)                                        | 53 (59.3)                                           | 0.35    |
| Hypertensive* at baseline (%)     | 79 (84.0)                             | 26 (74.3)                                        | 53 (89.8)                                           | 0.078   |
| Diabetes (%)                      | 20 (21.3)                             | 12 (34.3)                                        | 8 (13.6)                                            | <0.0001 |
| Hyperlipidaemia (%)               | 40 (42.6)                             | 17 (48.6)                                        | 23 (39.0)                                           | 0.40    |
| IHD (%)                           | 22 (23.4)                             | 9 (25.7)                                         | 13 (22.0)                                           | 0.80    |
| PVD (%)                           | 13 (13.8)                             | 5 (14.3)                                         | 8 (13.6)                                            | 0.99    |
| Current smoker (%)                | 11 (11.7)                             | 5 (14.3)                                         | 6 (10.2)                                            | 0.74    |
| Atrial fibrillation (%)           | 20 (21.3)                             | 8 (22.9)                                         | 11 (18.6)                                           | 0.79    |
| Prior stroke/ TIA (%)             | 22 (23.4)                             | 9 (25.7)                                         | 13 (22.0)                                           | 0.80    |
| Mean baseline SBP (SD)            | 154.9 (23.3)                          | 149.1 (25.2)                                     | 158.0 (21.8)                                        | 0.074   |
| Mean 1 month SBP (SD)             | 136.9 (18.5)                          | 143.0 (20.0)                                     | 133.6 (17.0)                                        | 0.017   |
| Intracranial stenoses             |                                       |                                                  |                                                     |         |
| Mean per patient (SD)             | 2.20 (1.6)                            | 2.66 (2.0)                                       | 1.93 (1.3)                                          | 0.035   |
| Ant circulation <sup>‡</sup> (%)  | 63 (67.0)                             | 28 (80.0)                                        | 35 (59.3)                                           | 0.042   |
| Post circulation <sup>‡</sup> (%) | 63 (67.0)                             | 23 (65.7)                                        | 40 (67.8)                                           | 0.99    |

\*Systolic blood pressure >130/80mmHg. <sup>‡</sup>Any anterior or posterior intracranial stenosis. SD= standard deviation; IHD= ischaemic heart disease; PVD= peripheral vascular disease; SBP= systolic blood pressure (mmHg); DBP= diastolic blood pressure (mmHg); ant= anterior; post= posterior.



**Supplementary Figure 1a:** Flow diagram of systematic review inclusion/ exclusion for prevalence of ICS in Caucasian TIA/ stroke patients and Medline and Embase search terms

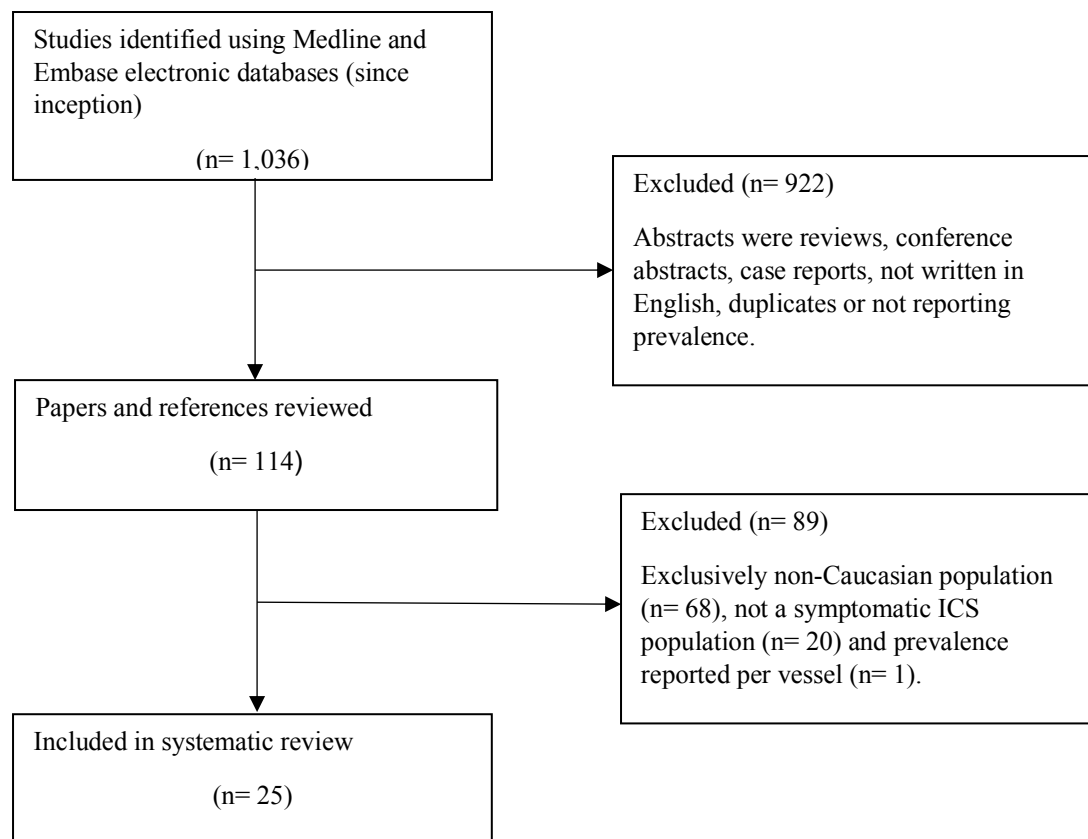

#### Medline search terms

1. Intracranial arteriosclerosis/
2. (intracranial adj3 stenosis\*).ti,ab.
3. (intra-cranial adj3 stenosis\*).ti,ab.
4. (intracranial adj3 arteriosclerosis\*).ti,ab.
5. (intracranial adj3 atherosclerosis\*).ti,ab.
6. ((brain or cerebr\*) adj3 atherosclerosis\*).ti,ab.
7. ((brain or cerebr\*) adj3 arteriosclerosis\*).ti,ab.
8. 1 or 2 or 3 or 4 or 5 or 6 or 7
9. Prevalence/
10. Prevalence\*.ti,ab.
11. 9 or 10
12. 8 and 11

#### Embase search terms

1. \*prevalence/
2. Prevalence\*.ti,ab.
3. 1 or 2
4. \*brain atherosclerosis/
5. (intracranial adj3 stenosis\*).ti,ab.
6. (intra-cranial adj3 stenosis\*).ti,ab.
7. (intracranial adj3 arteriosclerosis\*).ti,ab.
8. (intracranial adj3 atherosclerosis\*).ti,ab.
9. ((brain or cerebr\*) adj3 atherosclerosis\*).ti,ab.
10. ((brain or cerebr\*) adj3 arteriosclerosis\*).ti,ab.
11. 4 or 5 or 6 or 7 or 8 or 9 or 10
12. 3 and 11
13. Conference\*.pt.
14. 12 not 13

**Supplementary Figure 1b:** Flow diagram of systematic review inclusion/ exclusion for prognosis medically treated Caucasian TIA/ stroke patients with symptomatic ICS and Medline and Embase search terms

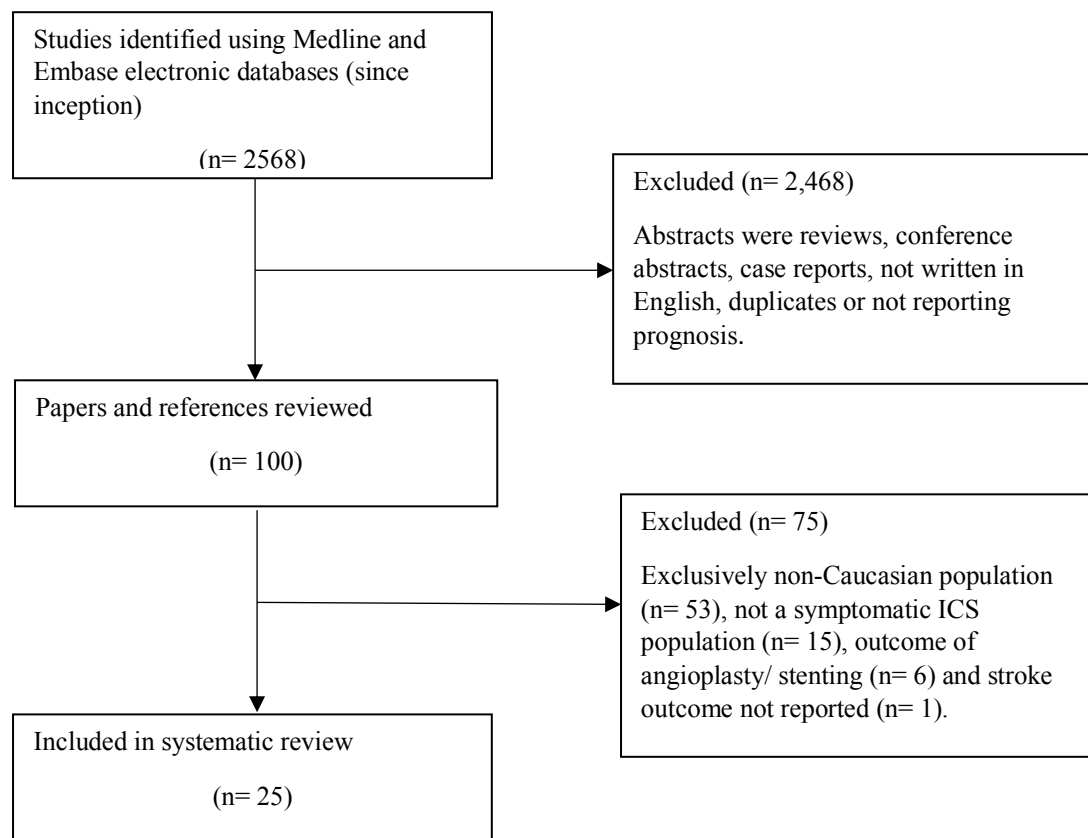

#### Medline

1. Intracranial arteriosclerosis/
2. (intracranial adj3 stenosis\*).ti,ab.
3. (intra-cranial adj3 stenosis\*).ti,ab.
4. (intracranial adj3 arteriosclerosis\*).ti,ab.
5. (intracranial adj3 atherosclerosis\*).ti,ab.
6. ((brain or cerebr\*) adj3 atherosclerosis\*).ti,ab.
7. ((brain or cerebr\*) adj3 arteriosclerosis\*).ti,ab.
8. 1 or 2 or 3 or 4 or 5 or 6 or 7
9. Follow up studies.sh.
10. Prognosis\*.tw.
11. Exp treatment outcome/
12. 9 or 10 or 11
13. 8 and 12

#### Embase

1. \*brain atherosclerosis/
2. (intracranial adj3 stenosis\*).ti,ab.
3. (intra-cranial adj3 stenosis\*).ti,ab.
4. brain atherosclerosis/
5. (intracranial adj3 arteriosclerosis\*).ti,ab.
6. (intracranial adj3 atherosclerosis\*).ti,ab.
7. ((brain or cerebr\*) adj3 atherosclerosis\*).ti,ab.
8. ((brain or cerebr\*) adj3 arteriosclerosis\*).ti,ab.
9. 1 or 2 or 3 or 4 or 5 or 6 or 7 or 8
10. Exp \*treatment outcome/
11. Outcome\*.ti,ab.
12. Follow-up.mp.
13. Survival.tw.
14. Prognosis\*.tw.
15. 10 or 11 or 12 or 13 or 14
16. 9 and 15
17. Conference\*.pt.
18. 16 not 17

**Supplementary Figure 2:** Kaplan-Meier curves comparing the risk of any recurrent ischaemic stroke in patients as reported in some previous studies with the risk of same-territory recurrent ischaemic stroke with SAMMPRIS inclusion criteria in patients with **a)** 50-99% symptomatic intracranial stenosis (ICS) and **b)** 70-99% symptomatic ICS.

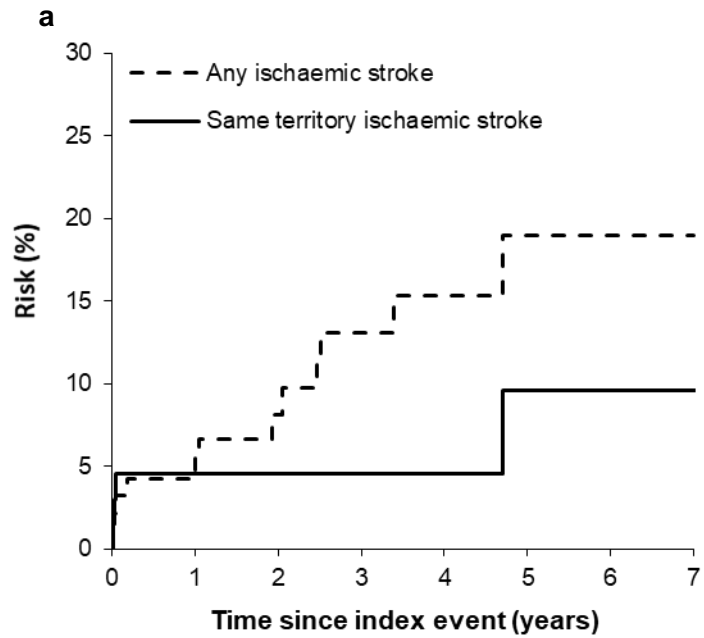

|                   |    |    |    |    |    |    |    |   |
|-------------------|----|----|----|----|----|----|----|---|
| Any IS            | 94 | 80 | 59 | 43 | 35 | 20 | 10 | 3 |
| Same territory IS | 66 | 56 | 41 | 32 | 26 | 16 | 4  | 3 |

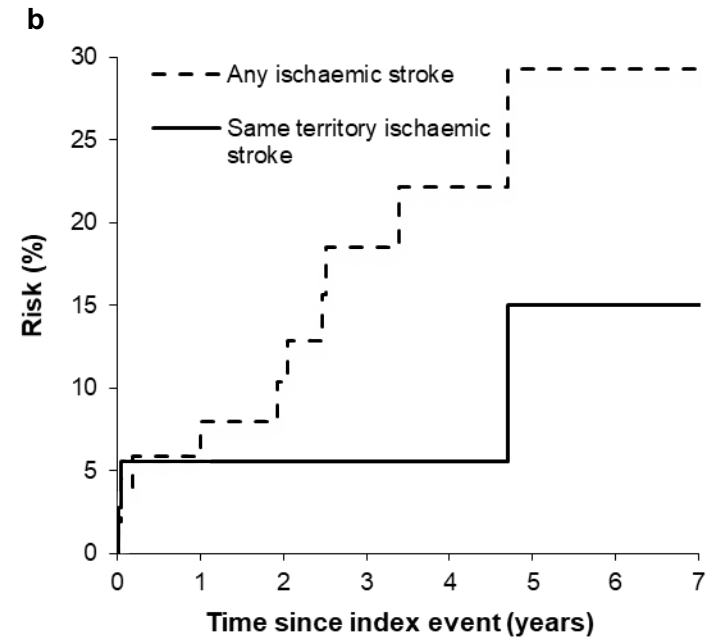

|                   |    |    |    |    |    |   |   |   |
|-------------------|----|----|----|----|----|---|---|---|
| Any IS            | 52 | 45 | 35 | 26 | 19 | 9 | 5 | 2 |
| Same territory IS | 36 | 32 | 26 | 22 | 17 | 8 | 4 | 2 |

### Supplementary References

- 1 Sacco RL, Kargman DE, Gu Q, Zamanillo MC. Race-ethnicity and determinants of intracranial atherosclerotic cerebral infarction. The Northern Manhattan Stroke Study. *Stroke* 1995; **26**: 14–20.
- 2 Wityk RJ, Lehman D, Klag M, Coresh J, Ahn H, Litt B. Race and sex differences in the distribution of cerebral atherosclerosis. *Stroke* 1996; **27**: 1974–80.
- 3 Thijs VN, Albers GW. Symptomatic intracranial atherosclerosis: outcome of patients who fail antithrombotic therapy. *Neurology* 2000; **55**: 490–7.
- 4 Weimar C, Goertler M, Harms L, Diener H-C. Distribution and outcome of symptomatic stenoses and occlusions in patients with acute cerebral ischemia. *Arch Neurol* 2006; **63**: 1287–91.
- 5 Meseguer E, Lavalley PC, Mazighi M, *et al.* Yield of systematic transcranial Doppler in patients with transient ischemic attack. *Ann Neurol* 2010; **68**: 9–17.
- 6 Weber R, Kraywinkel K, Diener H-C, Weimar C. Symptomatic intracranial atherosclerotic stenoses: prevalence and prognosis in patients with acute cerebral ischemia. *Cerebrovasc Dis* 2010; **30**: 188–93.
- 7 Lau AY, Wong KL, Lev M, Furie K, Smith W, Kim AS. Burden of intracranial steno-occlusive lesions on initial computed tomography angiography predicts poor outcome in patients with acute stroke. *Stroke* 2013; **44**: 1310–6.
- 8 Holzer K, Sadikovic S, Esposito L, *et al.* Transcranial Doppler ultrasonography predicts cardiovascular events after TIA. *BMC Med Imaging* 2009; **9**: 13.
- 9 Homburg PJ, Plas GJJ, Rozie S, van der Lugt A, Dippel DWJ. Prevalence and calcification of intracranial arterial stenotic lesions as assessed with multidetector computed tomography angiography. *Stroke* 2011; **42**: 1244–50.
- 10 von Weitzel-Mudersbach P, Paaske Johnsen S, Andersen G. Intra- and extracranial stenoses in TIA - findings from the Aarhus TIA-study: a prospective population-based study. *Perceptives Med* 2012; **1**: 207–10.
- 11 Amarenco P, Labreuche J, Lavalley PC. Patients with transient ischemic attack with ABCD2 <4 can have similar 90-day stroke risk as patients with transient ischemic attack with ABCD2 ≥4. *Stroke* 2012; **43**: 863–5.
- 12 Ovesen C, Abild A, Christensen AF, *et al.* Prevalence and long-term clinical significance of intracranial atherosclerosis after ischaemic stroke or transient ischaemic attack: a cohort study. *BMJ Open* 2013; **3**: e003724.
- 13 Ssi-Yan-Kai G, Nasr N, Faury A, *et al.* Intracranial artery stenosis or occlusion predicts ischemic recurrence after transient ischemic attack. *AJNR Am J Neuroradiol* 2013; **34**: 185–90.
- 14 Wolff V, Armspach J-P, Beaujeux R, *et al.* High frequency of intracranial arterial stenosis and cannabis use in ischaemic stroke in the young. *Cerebrovasc Dis* 2014; **37**: 438–43.
- 15 Logallo N, Naess H, Waje-Andreassen U, Thomassen L. Prevalence of intracranial stenosis in a Norwegian ischemic stroke population. *J Stroke Cerebrovasc Dis* 2014; **23**: 1611–5.
- 16 Tsvigoulis G, Vadikolias K, Heliopoulos I, *et al.* Prevalence of symptomatic intracranial atherosclerosis in Caucasians: a prospective, multicenter, transcranial Doppler study. *J Neuroimaging* 2014; **24**: 11–7.
- 17 Gouveia A, Sargento-Freitas J, Penetra J, *et al.* Recurrence in intracranial atherosclerotic disease: a stenosis-based analysis. *J Stroke Cerebrovasc Dis* 2014; **23**: 2080–4.
- 18 Baracchini C, Anzola GP, Cenciarelli S, *et al.* Italian symptomatic intracranial atherosclerosis study (ISIDE) : A multicenter transcranial ultrasound evaluation. *Neurol Sci Off J Ital Neurol Soc Ital Soc Clin Neurophysiol* 2016; **37**: 1645–51.
- 19 Hoshino T, Sissani L, Labreuche J, *et al.* Prevalence of Systemic Atherosclerosis Burdens and Overlapping Stroke Etiologies and Their Associations With Long-term Vascular Prognosis in Stroke With Intracranial Atherosclerotic Disease. *JAMA Neurol* 2018; **75**: 203–11.

- 20 Uchiyama S, Hoshino T, Sissani L, *et al.* Japanese Versus Non-Japanese Patients with Transient Ischemic Attack or Minor Stroke: Subanalysis of TIA registry.org. *J Stroke Cerebrovasc Dis* 2019; **28**: 2232–41.
- 21 Kappelle LJ, Eliasziw M, Fox AJ, Sharpe BL, Barnett HJ. Importance of intracranial atherosclerotic disease in patients with symptomatic stenosis of the internal carotid artery. The North American Symptomatic Carotid Endarterectomy Trial. *Stroke* 1999; **30**: 282–6.
- 22 von Sarnowski B, Schminke U, Tatlisumak T, *et al.* Prevalence of stenoses and occlusions of brain-supplying arteries in young stroke patients. *Neurology* 2013; **80**: 1287–94.
- 23 Mattioni A, Cenciarelli S, Biessels G, van Seeters T, Algra A, Ricci S. Prevalence of intracranial large artery stenosis and occlusion in patients with acute ischaemic stroke or TIA. *Neurol Sci Off J Ital Neurol Soc Ital Soc Clin Neurophysiol* 2014; **35**: 349–55.
- 24 Marquardt L, Kuker W, Chandratheva A, Geraghty O, Rothwell PM. Incidence and prognosis of > or = 50% symptomatic vertebral or basilar artery stenosis: prospective population-based study. *Brain* 2009; **132**: 982–8.
- 25 Klein IF, Lavalley PC, Mazighi M, Schouman-Claeys E, Labreuche J, Amarenco P. Basilar artery atherosclerotic plaques in paramedian and lacunar pontine infarctions: a high-resolution MRI study. *Stroke* 2010; **41**: 1405–9.
- 26 Chimowitz MI, Lynn MJ, Howlett-Smith H, *et al.* Comparison of warfarin and aspirin for symptomatic intracranial arterial stenosis. *N Engl J Med* 2005; **352**: 1305–16.
- 27 Mazighi M, Tanasescu R, Ducrocq X, *et al.* Prospective study of symptomatic atherothrombotic intracranial stenoses: the GESICA study. *Neurology* 2006; **66**: 1187–91.
- 28 Samaniego EA, Hetzel S, Thirunarayanan S, Aagaard-Kienitz B, Turk AS, Levine R. Outcome of symptomatic intracranial atherosclerotic disease. *Stroke* 2009; **40**: 2983–7.
- 29 Kozak O, Tariq N, Suri MFK, Taylor RA, Qureshi AI. High risk of recurrent ischemic events among patients with deferred intracranial angioplasty and stent placement for symptomatic intracranial atherosclerosis. *Neurosurgery* 2011; **69**: 333–4.
- 30 Nahab F, Kingston C, Frankel MR, *et al.* Early aggressive medical management for patients with symptomatic intracranial stenosis. *J Stroke Cerebrovasc Dis* 2013; **22**: 87–91.
- 31 Derdeyn CP, Chimowitz MI, Lynn MJ, *et al.* Aggressive medical treatment with or without stenting in high-risk patients with intracranial artery stenosis (SAMMPRIS): the final results of a randomised trial. *Lancet* 2014; **383**: 333–41.
- 32 Zaidat OO, Fitzsimmons B-F, Woodward BK, *et al.* Effect of a balloon-expandable intracranial stent vs medical therapy on risk of stroke in patients with symptomatic intracranial stenosis: the VISSIT randomized clinical trial. *JAMA* 2015; **313**: 1240–8.
- 33 Caliendo P, Reale G, Demchuk AM, *et al.* Symptomatic intracranial atherosclerotic disease: an ultrasound 2-year follow-up pilot study. *Neurol Sci Off J Ital Neurol Soc Ital Soc Clin Neurophysiol* 2018; **39**: 1955–9.
- 34 Hinton RC, Mohr JP, Ackerman RH, Adair LB, Fisher CM. Symptomatic middle cerebral artery stenosis. *Ann Neurol* 1979; **5**: 152–7.
- 35 Failure of extracranial-intracranial arterial bypass to reduce the risk of ischemic stroke. Results of an international randomized trial. *N Engl J Med* 1985; **313**: 1191–200.
- 36 Wechsler LR, Kistler JP, Davis KR, Kaminski MJ. The prognosis of carotid siphon stenosis. *Stroke* 1986; **17**: 714–8.
- 37 Arenillas JF, Molina CA, Montaner J, Abilleira S, Gonzalez-Sanchez MA, Alvarez-Sabin J. Progression and clinical recurrence of symptomatic middle cerebral artery stenosis: a long-term follow-up transcranial Doppler ultrasound study. *Stroke* 2001; **32**: 2898–904.
- 38 Kern R, Steinke W, Daffertshofer M, Prager R, Hennerici M. Stroke recurrences in patients with symptomatic vs asymptomatic middle cerebral artery disease. *Neurology* 2005; **65**: 859–64.

- 39 Moufarrij NA, Little JR, Furlan AJ, Leatherman JR, Williams GW. Basilar and distal vertebral artery stenosis: long-term follow-up. *Stroke* 1986; **17**: 938–42.
- 40 Pessin MS, Gorelick PB, Kwan ES, Caplan LR. Basilar artery stenosis: middle and distal segments. *Neurology* 1987; **37**: 1742–6.
- 41 Pessin MS, Kwan ES, DeWitt LD, Hedges TR 3rd, Gale D, Caplan LR. Posterior cerebral artery stenosis. *Ann Neurol* 1987; **21**: 85–9.
- 42 Qureshi AI, Ziai WC, Yahia AM, *et al.* Stroke-free survival and its determinants in patients with symptomatic vertebrobasilar stenosis: a multicenter study. *Neurosurgery* 2003; **52**: 1033–40.
- 43 Markus HS, Larsson SC, Kuker W, *et al.* Stenting for symptomatic vertebral artery stenosis: The Vertebral Artery Ischaemia Stenting Trial. *Neurology* 2017; **89**: 1229–36.
